# Supplementary material for: Distribution and colocalization of melatonin 1a-receptor and NADPH-d in the trigeminal system of rat
Source: PeerJ. 2019 May 1;7:e6877. doi: 10.7717/peerj.6877 (PMC6500374; doi:10.7717/peerj.6877)
Supplement: Supplemental Information 1 [file peerj-07-6877-s001.csv]

Summary of the expression of MT1 and NADPH-d in TG neurons in the rat
Group	Large-diameter cells£¨%£©	Medium-diameter cells£¨%£©	Small-diameter cells£¨%£©	Total
MT1R	531(26.3%)	621(30.8%)	864(42.9%)	2016
NADPH-d 522(23.1%) 756(33.5%) 981(42.4%) 2259	522(23.1%)	756(33.5%)	981(42.4%)	2259
